# Supplementary material for: Tuning of the double-well potential of short strong hydrogen bonds by ionic interactions in alkali metal hydrodicarboxylates
Source: Royal Society of Chemistry journal article supplement (doi:10.1039/c5ra19870d), 2015-01-01
Supplement: c5ra19870d1.pdf [file c5ra19870d1.pdf]

Table S1. Crystal data and routine refinement details for **1** (C<sub>4</sub>H<sub>3</sub>NaO<sub>4</sub>, M = 138.05, space group P-1, Z = 2) and **2** (C<sub>4</sub>H<sub>3</sub>KO<sub>4</sub>, M = 154.16, space group P-1, Z = 1).

|                                                                                    | <b>1</b>     |              |              |              |              | <b>2</b>     |              |              |              |              |
|------------------------------------------------------------------------------------|--------------|--------------|--------------|--------------|--------------|--------------|--------------|--------------|--------------|--------------|
|                                                                                    | 100          | 150          | 200          | 250          | 300          | 100          | 150          | 200          | 250          | 300          |
| T, K                                                                               |              |              |              |              |              |              |              |              |              |              |
| a, Å                                                                               | 6.2337(4)    | 6.2351(4)    | 6.2374(4)    | 6.2401(3)    | 6.2421(4)    | 5.3298(4)    | 5.3352(5)    | 5.3403(5)    | 5.3472(6)    | 5.3534(7)    |
| b, Å                                                                               | 6.7932(5)    | 6.8144(5)    | 6.8401(4)    | 6.8687(4)    | 6.8981(5)    | 6.4933(4)    | 6.5195(6)    | 6.5443(6)    | 6.5737(7)    | 6.6038(9)    |
| c, Å                                                                               | 7.4636(5)    | 7.4635(5)    | 7.4662(4)    | 7.4695(4)    | 7.4726(5)    | 7.9425(4)    | 7.9435(7)    | 7.9451(7)    | 7.9466(8)    | 7.9446(11)   |
| α, °                                                                               | 67.8720(10)  | 67.9990(10)  | 68.1330(10)  | 68.2700(10)  | 68.4070(10)  | 82.0390(10)  | 82.093(2)    | 82.134(2)    | 82.191(2)    | 82.252(3)    |
| β, °                                                                               | 72.6380(10)  | 72.7000(10)  | 72.7660(10)  | 72.8360(10)  | 72.9030(10)  | 87.9430(10)  | 87.953(2)    | 87.969(2)    | 87.998(2)    | 88.021(3)    |
| γ, °                                                                               | 63.2960(10)  | 63.3370(10)  | 63.3940(10)  | 63.4500(10)  | 63.5040(10)  | 67.2640(10)  | 67.230(2)    | 67.198(2)    | 67.167(2)    | 67.127(2)    |
| V, Å <sup>3</sup>                                                                  | 258.35(3)    | 259.54(3)    | 261.08(3)    | 262.78(2)    | 264.48(3)    | 251.03(3)    | 252.30(4)    | 253.51(4)    | 255.01(5)    | 256.37(6)    |
| D <sub>calc</sub> , g·cm <sup>-3</sup>                                             | 1.982        | 1.973        | 1.961        | 1.948        | 1.936        | 1.826        | 1.817        | 1.809        | 1.798        | 1.788        |
| μ, cm <sup>-1</sup>                                                                | 9.51         | 9.46         | 9.41         | 9.35         | 9.29         | 2.34         | 2.33         | 2.32         | 2.3          | 2.29         |
| F(000)                                                                             | 156          | 156          | 156          | 156          | 156          | 140          | 140          | 140          | 140          | 140          |
| 2θ <sub>max</sub> , °                                                              | 60           | 60           | 60           | 59           | 59           | 60           | 60           | 59           | 60           | 59           |
| Reflns measured                                                                    | 3387         | 3403         | 3415         | 3436         | 3460         | 3355         | 3386         | 3391         | 3412         | 3424         |
| Independent reflns                                                                 | 1499         | 1508         | 1518         | 1527         | 1539         | 1467         | 1475         | 1480         | 1492         | 1498         |
| Reflns with I>2σ(I)                                                                | 1420         | 1435         | 1427         | 1435         | 1425         | 1378         | 1352         | 1341         | 1346         | 1317         |
| Parameters                                                                         | 94           | 94           | 94           | 94           | 94           | 95           | 95           | 95           | 95           | 95           |
| R1                                                                                 | 0.0219       | 0.0231       | 0.0235       | 0.0238       | 0.0242       | 0.0266       | 0.0308       | 0.0310       | 0.0330       | 0.0344       |
| wR2                                                                                | 0.0603       | 0.0628       | 0.0661       | 0.0651       | 0.0679       | 0.0768       | 0.0854       | 0.0868       | 0.0920       | 0.0952       |
| GOF                                                                                | 1.065        | 1.069        | 1.067        | 1.043        | 1.055        | 1.074        | 1.051        | 1.076        | 1.068        | 1.066        |
| Residual electron density, e·Å <sup>-3</sup> (d <sub>min</sub> /d <sub>max</sub> ) | 0.478/-0.324 | 0.411/-0.330 | 0.399/-0.333 | 0.402/-0.244 | 0.373/-0.237 | 0.590/-0.311 | 0.531/-0.249 | 0.509/-0.286 | 0.459/-0.246 | 0.451/-0.231 |

Table S2. C-C bond lengths [ $\text{\AA}$ ] for **1** and **2**.

| Bond      | salt <b>1</b> | salt <b>2</b> |
|-----------|---------------|---------------|
| C(1)-C(2) | 1.4864(3)     | 1.4908(4)     |
| C(2)-C(3) | 1.3355(3)     | 1.3354(4)     |
| C(3)-C(4) | 1.4932(3)     | 1.4953(4)     |

Table S3. Weak anion-anion interactions in crystals of **1** and **2** according to the topological analysis of the experimental  $\rho(\mathbf{r})$  function.

| Compound <b>1</b> |                        |                                                  |                                                          |                              |                            |                                 |
|-------------------|------------------------|--------------------------------------------------|----------------------------------------------------------|------------------------------|----------------------------|---------------------------------|
|                   | $d,^a$<br>$\text{\AA}$ | $\rho(\mathbf{r}),^b$<br>$e\cdot\text{\AA}^{-3}$ | $\nabla^2\rho(\mathbf{r}),^b$<br>$e\cdot\text{\AA}^{-5}$ | $h_e(\mathbf{r}),^c$<br>a.u. | $v(\mathbf{r}),^c$<br>a.u. | $E_{\text{int}},^d$<br>kcal/mol |
| O(4)...O(4)       | 3.263                  | 0.035597                                         | 0.319711                                                 | 0.000647                     | -0.00202                   | 0.63504                         |
| O(4)...O(3)       | 3.379                  | 0.040551                                         | 0.33458                                                  | 0.000587                     | -0.0023                    | 0.720695                        |
| H(3)...O(2)       | 2.564                  | 0.066869                                         | 0.77643                                                  | 0.001372                     | -0.00531                   | 1.666038                        |
| H(2)...O(2)       | 2.812                  | 0.036407                                         | 0.426233                                                 | 0.000997                     | -0.00243                   | 0.761483                        |
| C(4)...O(1)       | 3.029                  | 0.058528                                         | 0.672077                                                 | 0.001273                     | -0.00443                   | 1.388679                        |
| O(3)...O(3)       | 3.166                  | 0.022134                                         | 0.517813                                                 | 0.001583                     | -0.00221                   | 0.692143                        |
| H(3)...O(3)       | 3.06                   | 0.018598                                         | 0.256858                                                 | 0.000733                     | -0.0012                    | 0.376192                        |
| C(2)...C(1)       | 3.161                  | 0.069076                                         | 0.638192                                                 | 0.000821                     | -0.00498                   | 1.561871                        |
| C(2)...C(2)       | 3.219                  | 0.057327                                         | 0.505184                                                 | 0.000731                     | -0.00378                   | 1.185365                        |
| Compound <b>2</b> |                        |                                                  |                                                          |                              |                            |                                 |
|                   | $d,^a$<br>$\text{\AA}$ | $\rho(\mathbf{r}),^b$<br>$e\cdot\text{\AA}^{-3}$ | $\nabla^2\rho(\mathbf{r}),^b$<br>$e\cdot\text{\AA}^{-5}$ | $h_e(\mathbf{r}),^c$<br>a.u. | $v(\mathbf{r}),^c$<br>a.u. | $E_{\text{int}},^d$<br>kcal/mol |
| O(2)...H(3)       | 2.57                   | 0.073388                                         | 0.689766                                                 | 0.000852                     | -0.00545                   | 1.709963                        |
| O(2)...H(3)       | 3.011                  | 0.047137                                         | 0.313445                                                 | 0.000351                     | -0.00255                   | 0.799761                        |
| O(2)...C(2)       | 3.218                  | 0.059014                                         | 0.435583                                                 | 0.00044                      | -0.00364                   | 1.14144                         |
| O(2)...O(2)       | 3.436                  | 0.041482                                         | 0.267631                                                 | 0.000333                     | -0.00211                   | 0.662023                        |
| O(3)...C(2)       | 3.703                  | 0.0353                                           | 0.470167                                                 | 0.001173                     | -0.00253                   | 0.794113                        |
| O(3)...H(2)       | 2.728                  | 0.026683                                         | 0.496942                                                 | 0.001434                     | -0.00229                   | 0.717243                        |
| O(1)...C(4)       | 3.002                  | 0.05568                                          | 0.66557                                                  | 0.001334                     | -0.00424                   | 1.329065                        |
| C(4)...C(4)       | 3.266                  | 0.032014                                         | 0.399747                                                 | 0.000998                     | -0.00215                   | 0.674886                        |

a – distances (the H(2) and H(3) hydrogen atoms are fixed at the calculated C-H bond lengths derived by the DFT optimization of anionic dimer with the fixed O...O distance: 1.083  $\text{\AA}$ ), b – values at (3,-1) corresponding bond critical points (*bcp*) of  $\rho(\mathbf{r})$ , c – estimations of energy densities at *bcp* ( $h_e(\mathbf{r})$  – total electron energy density,  $v(\mathbf{r})$  – potential energy density) according to Kirzhnitz model and local virial theorem, d – interaction energy  $E_{\text{int}}$  estimated as  $-0.5\cdot v(\mathbf{r})$ .

The H...O interactions (C-H...O contacts) can be the only additional “force” that influence charge distribution within carboxylate groups and, hence, **DWP** peculiarities. However, one can see that 1) energies of such interactions are not more 1.7 kcal/mol that smaller than the weakest metal-oxygen bond (2.0 kcal/mol in **2**) and 2) these interactions are formed only by the O(2) and O(3) atoms which are not involved in the H-bond. Moreover, the energy difference caused by C-H...O interaction is very similar in both **1** and **2** (2 and 1.8 kcal/mol respectively) and what is more important it is antitate to the difference calculated from metal-oxygen interactions. Namely, the COOH group form more stronger C-H...O bonding than the COO group, although the negative charge of the oxygen atom forming C-H...O interactions has to become larger like that value of the oxygen atom forming interactions with a cation. One can suppose that these interactions are conformed to cation-anion interactions.

Table S4. Temperature evolution of the metal-oxygen distances and corresponding energies of cation-anion interactions in **1** and **2**.

|                               |                         |            |            |            |            |            |            |            |
|-------------------------------|-------------------------|------------|------------|------------|------------|------------|------------|------------|
| distance, Å                   | Temperature, K          | Na(1)-O(2) | Na(1)-O(1) | Na(1)-O(4) | Na(1)-O(4) | Na(1)-O(3) | Na(1)-O(3) |            |
|                               | 100 <sup>x</sup>        | 2.3693(8)  | 2.3703(8)  | 2.3894(8)  | 2.566(8)   | 2.4056(8)  | 2.4089(8)  |            |
|                               | 150                     | 2.3713(9)  | 2.3735(9)  | 2.3932(9)  | 2.5817(9)  | 2.4083(9)  | 2.4145(9)  |            |
|                               | 200                     | 2.3731(9)  | 2.3766(9)  | 2.3985(9)  | 2.5947(10) | 2.4098(9)  | 2.4205(10) |            |
|                               | 250                     | 2.3749(9)  | 2.3815(10) | 2.4032(9)  | 2.6112(10) | 2.4126(9)  | 2.4276(10) |            |
|                               | 300                     | 2.3765(10) | 2.3855(10) | 2.4086(10) | 2.6269(11) | 2.4132(10) | 2.4365(11) |            |
| energy, kcal/mol <sup>a</sup> | 100 <sup>x</sup>        | 4.506227   | 4.487903   | 4.153241   | 2.08623    | 3.890909   | 3.839744   |            |
|                               | 150                     | 4.469662   | 4.429818   | 4.089999   | 1.966899   | 3.848991   | 3.75461    |            |
|                               | 200                     | 4.437033   | 4.374337   | 4.00356    | 1.873781   | 3.825919   | 3.665699   |            |
|                               | 250                     | 4.404667   | 4.2882     | 3.928592   | 1.762528   | 3.783259   | 3.563477   |            |
|                               | 300                     | 4.376115   | 4.219271   | 3.844364   | 1.663403   | 3.774186   | 3.439757   |            |
|                               | Difference <sup>b</sup> | 0.130112   | 0.268632   | 0.308876   | 0.422826   | 0.116723   | 0.399987   |            |
| type <sup>c</sup>             | strong                  | strong     | strong     | weak       | strong     | strong     |            |            |
| distance, Å                   | Temperature, K          | K(1)-O(2)  | K(1)-O(2)  | K(1)-O(1)  | K(1)-O(4)  | K(1)-O(4)  | K(1)-O(3)  | K(1)-O(3)  |
|                               | 100 <sup>x</sup>        | 2.8878(9)  | 2.6806(8)  | 2.8086(8)  | 2.8649(8)  | 2.9163(9)  | 2.6773(8)  | 2.7357(9)  |
|                               | 150                     | 2.898(10)  | 2.6805(9)  | 2.8135(9)  | 2.8705(9)  | 2.9250(9)  | 2.678(8)   | 2.7397(9)  |
|                               | 200                     | 2.9111(10) | 2.6823(9)  | 2.8182(9)  | 2.8757(9)  | 2.9376(10) | 2.6796(9)  | 2.7462(10) |
|                               | 250                     | 2.9263(11) | 2.6833(9)  | 2.8246(9)  | 2.8832(9)  | 2.9498(10) | 2.6813(9)  | 2.7528(10) |
|                               | 300                     | 2.9396(11) | 2.6844(9)  | 2.8294(10) | 2.8889(10) | 2.9623(10) | 2.6836(9)  | 2.7601(10) |
| energy, kcal/mol <sup>a</sup> | 100 <sup>x</sup>        | 2.159258   | 4.267154   | 2.548301   | 2.125153   | 1.807772   | 4.315517   | 3.542367   |
|                               | 150                     | 2.090715   | 4.268611   | 2.507984   | 2.087522   | 1.757516   | 4.305207   | 3.49533    |
|                               | 200                     | 2.006201   | 4.242475   | 2.469976   | 2.05324    | 1.68974    | 4.281745   | 3.420365   |
|                               | 250                     | 1.912854   | 4.228031   | 2.419244   | 2.00489    | 1.626869   | 4.256973   | 3.346067   |
|                               | 300                     | 1.835118   | 4.212207   | 2.381953   | 1.968988   | 1.565131   | 4.223709   | 3.265967   |
|                               | Difference <sup>b</sup> | 0.32414    | 0.054947   | 0.166348   | 0.156165   | 0.242641   | 0.091808   | 0.2764     |
| type <sup>c</sup>             | weak                    | strong     | weak       | weak       | weak       | strong     | Strong     |            |

a – Energy of cation-anion interactions calculated at 100K as  $E_{\text{int}} = -0.5 \cdot v(r)$  ( $v(r)$  – potential energy density at *bcp* estimated by Kirzhnitz model from high-resolution **XRD** data) and at other temperatures according to power fits approximating energy/distance relation (see manuscript); b – the difference between cation-anion interaction energy values at 100 and 300K; c - qualitative strength of a diatomic interaction (see also manuscript); x – distance at 100K are given from the refinement with  $2\theta < 60^\circ$  (MoK $\alpha$  radiation).

Table S5. Temperature evolution of **ADP** measured by **XRD** for **1** and **2**: anisotropic parameters for non-hydrogen atoms ( $\lambda_i$  – eigenvalues of mean-square harmonic displacement matrix,  $U_{\text{eq}} = 1/3 \sum \lambda_i$ ) and isotropic parameter  $U_{\text{iso}}$  for the H(1).

|                               | <b>Salt 1</b> |         |              |         |         | <b>Salt 2</b> |         |             |         |         |
|-------------------------------|---------------|---------|--------------|---------|---------|---------------|---------|-------------|---------|---------|
|                               | C(1)          |         |              |         |         |               |         |             |         |         |
| Temperature, K                | 100           | 150     | 200          | 250     | 300     | 100           | 150     | 200         | 250     | 300     |
| $U_{\text{eq}}, \text{\AA}^2$ | 0.00812       | 0.01038 | 0.013        | 0.01563 | 0.01852 | 0.00943       | 0.01167 | 0.01404     | 0.01704 | 0.01973 |
| $\lambda_1, \text{\AA}^2$     | 0.0108        | 0.0133  | 0.017        | 0.0203  | 0.0244  | 0.0117        | 0.0141  | 0.0174      | 0.0212  | 0.0251  |
| $\lambda_2, \text{\AA}^2$     | 0.0073        | 0.0102  | 0.0124       | 0.016   | 0.0187  | 0.0095        | 0.0124  | 0.0157      | 0.0189  | 0.0219  |
| $\lambda_3, \text{\AA}^2$     | 0.0062        | 0.0077  | 0.0097       | 0.0106  | 0.0124  | 0.0071        | 0.0085  | 0.009       | 0.011   | 0.0122  |
|                               | C(2)          |         |              |         |         |               |         |             |         |         |
| Temperature, K                | 100           | 150     | 200          | 250     | 300     | 100           | 150     | 200         | 250     | 300     |
| $U_{\text{eq}}, \text{\AA}^2$ | 0.00867       | 0.01132 | 0.0139       | 0.01692 | 0.01972 | 0.01008       | 0.01276 | 0.01554     | 0.01862 | 0.02197 |
| $\lambda_1, \text{\AA}^2$     | 0.0102        | 0.0136  | 0.0171       | 0.0209  | 0.025   | 0.0125        | 0.0172  | 0.0215      | 0.0268  | 0.0324  |
| $\lambda_2, \text{\AA}^2$     | 0.0098        | 0.0126  | 0.0157       | 0.0195  | 0.0222  | 0.0114        | 0.0134  | 0.0163      | 0.0189  | 0.0225  |
| $\lambda_3, \text{\AA}^2$     | 0.006         | 0.0077  | 0.0089       | 0.0103  | 0.012   | 0.0063        | 0.0077  | 0.0088      | 0.0102  | 0.0111  |
|                               | C(3)          |         |              |         |         |               |         |             |         |         |
| Temperature, K                | 100           | 150     | 200          | 250     | 300     | 100           | 150     | 200         | 250     | 300     |
| $U_{\text{eq}}, \text{\AA}^2$ | 0.00878       | 0.01094 | 0.01389      | 0.01641 | 0.0197  | 0.00992       | 0.01211 | 0.01487     | 0.01781 | 0.02102 |
| $\lambda_1, \text{\AA}^2$     | 0.0115        | 0.0148  | 0.0188       | 0.0229  | 0.0281  | 0.012         | 0.0155  | 0.0196      | 0.0239  | 0.0296  |
| $\lambda_2, \text{\AA}^2$     | 0.0088        | 0.0109  | 0.0141       | 0.0164  | 0.0193  | 0.0118        | 0.0139  | 0.0166      | 0.0196  | 0.0221  |
| $\lambda_3, \text{\AA}^2$     | 0.0061        | 0.007   | 0.0088       | 0.01    | 0.0118  | 0.006         | 0.007   | 0.0084      | 0.01    | 0.0114  |
|                               | C(4)          |         |              |         |         |               |         |             |         |         |
| Temperature, K                | 100           | 150     | 200          | 250     | 300     | 100           | 150     | 200         | 250     | 300     |
| $U_{\text{eq}}, \text{\AA}^2$ | 0.00797       | 0.01031 | 0.01258      | 0.01516 | 0.01792 | 0.009         | 0.01125 | 0.01354     | 0.01618 | 0.01888 |
| $\lambda_1, \text{\AA}^2$     | 0.01          | 0.0134  | 0.0155       | 0.0183  | 0.0221  | 0.0115        | 0.0147  | 0.0176      | 0.0207  | 0.024   |
| $\lambda_2, \text{\AA}^2$     | 0.0078        | 0.0103  | 0.0129       | 0.0166  | 0.0202  | 0.0086        | 0.0113  | 0.014       | 0.0171  | 0.0206  |
| $\lambda_3, \text{\AA}^2$     | 0.0061        | 0.0073  | 0.0093       | 0.0106  | 0.0115  | 0.0069        | 0.0078  | 0.009       | 0.0108  | 0.012   |
|                               |               |         | <b>Na(1)</b> |         |         |               |         | <b>K(1)</b> |         |         |
| Temperature, K                | 100           | 150     | 200          | 250     | 300     | 100           | 150     | 200         | 250     | 300     |
| $U_{\text{eq}}, \text{\AA}^2$ | 0.01006       | 0.01338 | 0.01698      | 0.02093 | 0.02526 | 0.01067       | 0.01399 | 0.01773     | 0.02184 | 0.02608 |
| $\lambda_1, \text{\AA}^2$     | 0.0135        | 0.0184  | 0.0237       | 0.0298  | 0.0368  | 0.0145        | 0.0194  | 0.0251      | 0.031   | 0.0377  |
| $\lambda_2, \text{\AA}^2$     | 0.0094        | 0.012   | 0.0154       | 0.0184  | 0.0222  | 0.0099        | 0.0132  | 0.0167      | 0.0209  | 0.0249  |
| $\lambda_3, \text{\AA}^2$     | 0.0073        | 0.0098  | 0.0119       | 0.0146  | 0.0168  | 0.0076        | 0.0094  | 0.0114      | 0.0136  | 0.0157  |

|                           |         |         |         |        |         | O(1)   |         |         |         |         |
|---------------------------|---------|---------|---------|--------|---------|--------|---------|---------|---------|---------|
| Temperature, K            | 100     | 150     | 200     | 250    | 300     | 100    | 150     | 200     | 250     | 300     |
| $U_{eq}, \text{\AA}^2$    | 0.01079 | 0.01424 | 0.01821 | 0.0222 | 0.02646 | 0.0112 | 0.01435 | 0.01787 | 0.02184 | 0.02586 |
| $\lambda_1, \text{\AA}^2$ | 0.0179  | 0.0238  | 0.0308  | 0.0385 | 0.0466  | 0.0177 | 0.0237  | 0.0304  | 0.0371  | 0.0445  |
| $\lambda_2, \text{\AA}^2$ | 0.0093  | 0.0121  | 0.0152  | 0.0189 | 0.0216  | 0.0095 | 0.0117  | 0.0143  | 0.018   | 0.021   |
| $\lambda_3, \text{\AA}^2$ | 0.0052  | 0.0069  | 0.0086  | 0.0092 | 0.0112  | 0.0064 | 0.0077  | 0.0089  | 0.0104  | 0.012   |

|                           |         |         |         |         |         | O(2)    |         |         |         |         |
|---------------------------|---------|---------|---------|---------|---------|---------|---------|---------|---------|---------|
| Temperature, K            | 100     | 150     | 200     | 250     | 300     | 100     | 150     | 200     | 250     | 300     |
| $U_{eq}, \text{\AA}^2$    | 0.01105 | 0.01455 | 0.01826 | 0.02214 | 0.02648 | 0.01327 | 0.01738 | 0.02169 | 0.02661 | 0.03192 |
| $\lambda_1, \text{\AA}^2$ | 0.0161  | 0.0221  | 0.0289  | 0.0353  | 0.0431  | 0.0205  | 0.0279  | 0.0366  | 0.0456  | 0.0556  |
| $\lambda_2, \text{\AA}^2$ | 0.0093  | 0.0119  | 0.0149  | 0.0182  | 0.0211  | 0.011   | 0.0142  | 0.0172  | 0.0209  | 0.0248  |
| $\lambda_3, \text{\AA}^2$ | 0.0078  | 0.0097  | 0.011   | 0.0129  | 0.0152  | 0.0083  | 0.0101  | 0.0112  | 0.0133  | 0.0153  |

|                           |        |         |         |         |        | O(3)    |         |         |         |         |
|---------------------------|--------|---------|---------|---------|--------|---------|---------|---------|---------|---------|
| Temperature, K            | 100    | 150     | 200     | 250     | 300    | 100     | 150     | 200     | 250     | 300     |
| $U_{eq}, \text{\AA}^2$    | 0.0111 | 0.01443 | 0.01845 | 0.02269 | 0.0269 | 0.01178 | 0.01505 | 0.01905 | 0.02298 | 0.02727 |
| $\lambda_1, \text{\AA}^2$ | 0.0165 | 0.0223  | 0.029   | 0.0364  | 0.0436 | 0.0162  | 0.0218  | 0.0288  | 0.0351  | 0.0421  |
| $\lambda_2, \text{\AA}^2$ | 0.0099 | 0.012   | 0.0156  | 0.0187  | 0.0225 | 0.0112  | 0.0141  | 0.0171  | 0.021   | 0.0248  |
| $\lambda_3, \text{\AA}^2$ | 0.007  | 0.009   | 0.0108  | 0.013   | 0.0146 | 0.0079  | 0.0092  | 0.0113  | 0.0128  | 0.0149  |

|                           |         |         |         |         |         | O(4)    |         |         |         |         |
|---------------------------|---------|---------|---------|---------|---------|---------|---------|---------|---------|---------|
| Temperature, K            | 100     | 150     | 200     | 250     | 300     | 100     | 150     | 200     | 250     | 300     |
| $U_{eq}, \text{\AA}^2$    | 0.00974 | 0.01276 | 0.01604 | 0.01962 | 0.02373 | 0.01076 | 0.01377 | 0.01715 | 0.02089 | 0.02446 |
| $\lambda_1, \text{\AA}^2$ | 0.0142  | 0.0187  | 0.0245  | 0.0305  | 0.0382  | 0.0164  | 0.0209  | 0.0272  | 0.0328  | 0.0396  |
| $\lambda_2, \text{\AA}^2$ | 0.0093  | 0.0125  | 0.0152  | 0.0186  | 0.0216  | 0.01    | 0.0127  | 0.0154  | 0.0192  | 0.0216  |
| $\lambda_3, \text{\AA}^2$ | 0.0057  | 0.0071  | 0.0084  | 0.0097  | 0.0114  | 0.0059  | 0.0077  | 0.0089  | 0.0107  | 0.0122  |

|                         |         |         |         |         |         | H(1)    |         |         |         |         |
|-------------------------|---------|---------|---------|---------|---------|---------|---------|---------|---------|---------|
| Temperature, K          | 100     | 150     | 200     | 250     | 300     | 100     | 150     | 200     | 250     | 300     |
| $U_{iso}, \text{\AA}^2$ | 0.03753 | 0.04863 | 0.05102 | 0.05367 | 0.06441 | 0.08347 | 0.08865 | 0.08926 | 0.10121 | 0.10508 |
| st.un. <sup>a</sup>     | 0.00473 | 0.0059  | 0.00574 | 0.00591 | 0.00668 | 0.00936 | 0.00965 | 0.00908 | 0.00898 | 0.00942 |

a – standard uncertainty of the H(1) atom  $U_{iso}$  value derived by least-squares technique. Note that the uncertainty on  $U_{eq}$  values of non-hydrogen atoms were less than  $0.001 \text{\AA}^2$ .

Table S6. Distance and estimated energy of cation-anion interactions for two examples from Cambridge Structural Database.

|                                |          | CARVAS   |          |          |                       |                      |  |
|--------------------------------|----------|----------|----------|----------|-----------------------|----------------------|--|
|                                | Na-O(2)  | Na-O(1)  | Na-O(4)  | Na-O(3)  | $E_{O(4)}/E_{O(1)}^b$ | $E_{COO}/E_{COOH}^b$ |  |
| distance, Å                    | 2.508    | 2.326    | 2.369    | 2.474    |                       |                      |  |
|                                |          |          | 2.736    | 2.462    |                       |                      |  |
| energy, kcal/mole <sup>a</sup> | 2.601583 | 5.384693 | 4.51174  | 2.968089 | 0.249974              | 3.727242             |  |
|                                |          |          | 1.122926 | 3.110763 |                       |                      |  |
|                                |          | KHDFRM05 |          |          |                       |                      |  |
|                                | K-O(2)   | K-O(1)   | K-O(4)   | K-O(3)   | $E_{O(4)}/E_{O(1)}$   | $E_{COO}/E_{COOH}$   |  |
| distance, Å                    | 2.884    |          | 2.785    | 3.019    |                       |                      |  |
|                                | 2.805    |          |          | 2.794    |                       |                      |  |
|                                | 2.752    |          |          | 2.849    |                       |                      |  |
|                                |          |          |          | 2.926    |                       |                      |  |
| energy, kcal/mole <sup>a</sup> | 2.185427 |          | 3.008342 | 1.438021 | 3.008342              | 3.367467             |  |
|                                | 2.817703 |          |          | 2.920839 |                       |                      |  |
|                                | 3.354977 |          |          | 2.443722 |                       |                      |  |
|                                |          |          |          | 1.914649 |                       |                      |  |

a – energy of cation-anion interactions estimated according to power fits approximating energy/distance relation (see manuscript); b – energy difference between total cation-anion energy calculated for the O(1) and O(4) atoms ( $E_{O(4)}/E_{O(1)}$ ) and between two carboxylate groups ( $E_{COO}/E_{COOH}$ ), atoms are labeled according to **1** and **2**: the O(1) atom participates in the SSHB and formally is proton donor, the O(4) atom is proton acceptor, the O(2) atom is the H-bond-free atom of the proton donating carboxylate group, the O(3) atom is the H-bond-free atom of the proton accepting carboxylate group.

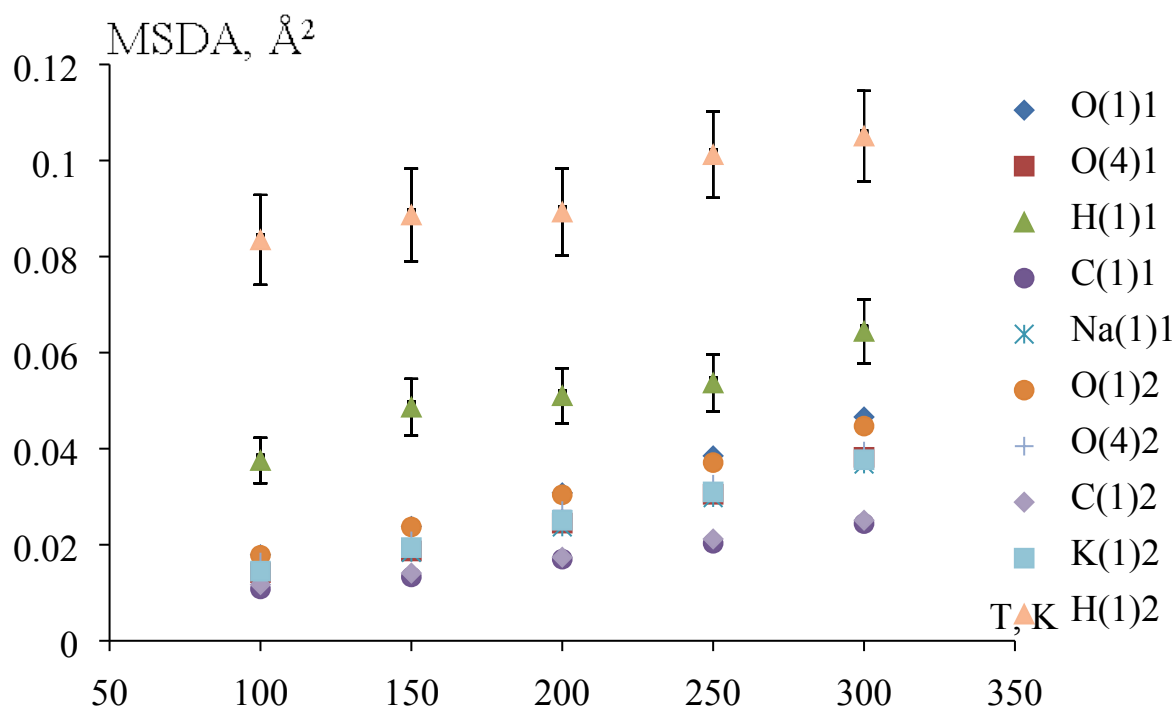

a

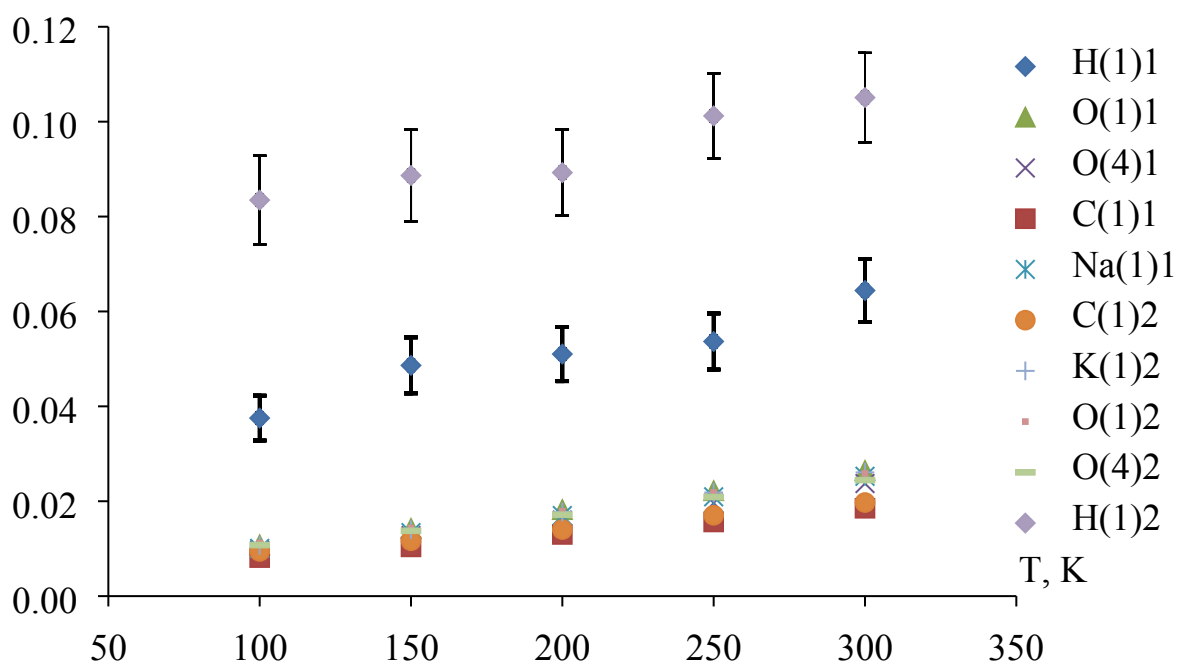

b

Fig. S1. Temperature dependence of mean-square displacement parameters  $\lambda_1$  (non-hydrogen atoms) and  $U_{\text{iso}}$  (the H(1) atom) for both **1** and **2** (a); temperature dependence of mean-square displacement parameters  $U_{\text{eq}}$  (non-hydrogen atoms) and  $U_{\text{iso}}$  (the H(1) atom) for both **1** and **2** (b). The digit on the right of closing bracket in the series caption denotes corresponding salt.

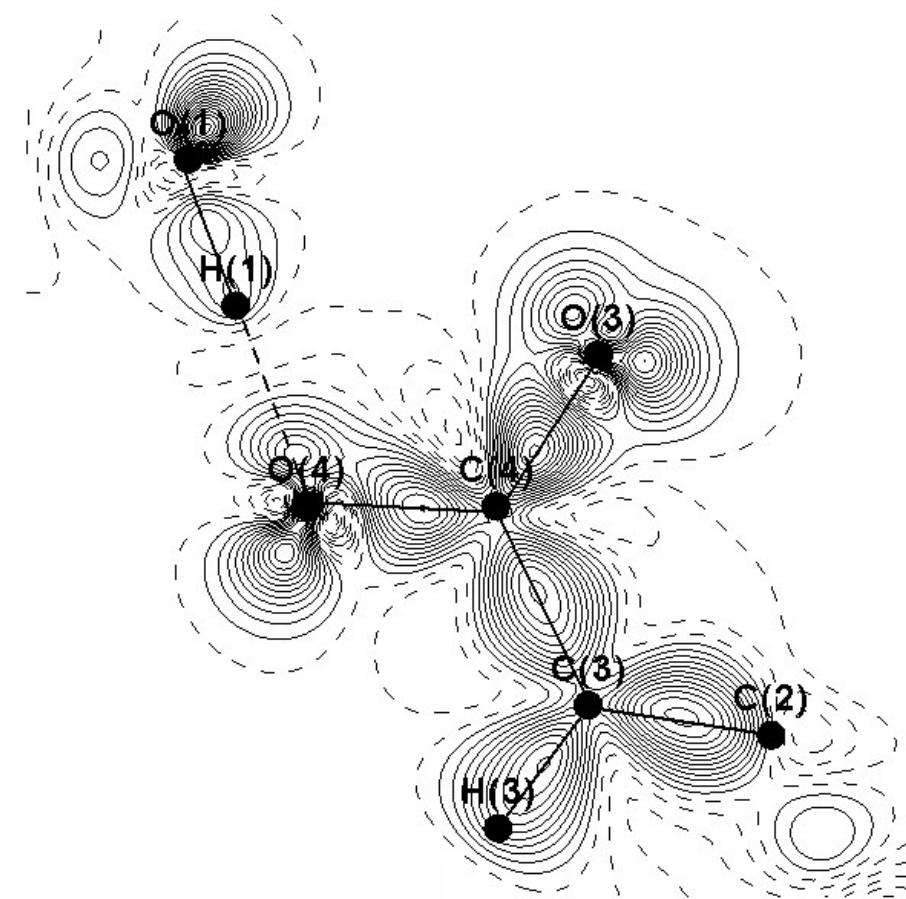

a

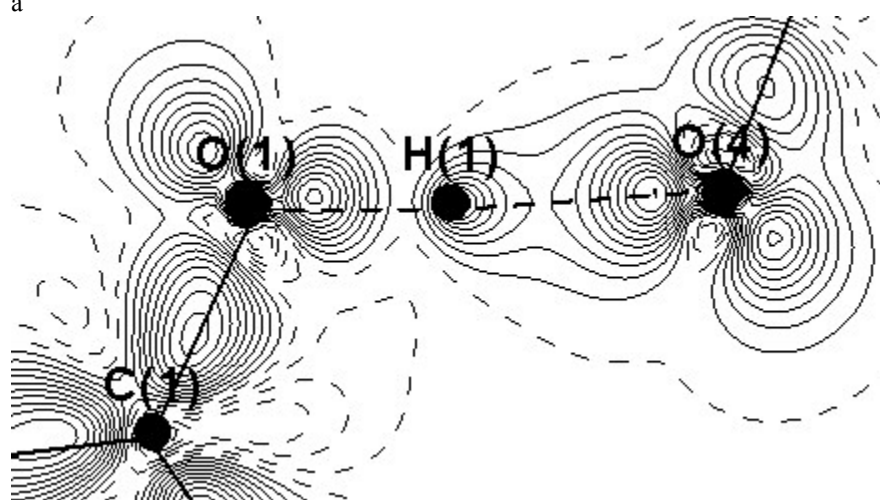

b

Fig. S2. Deformation density distribution in the area of the SSHB in **1** (a) and **2** (b). Negative and zero values are dashed, solid lines correspond to positive values (0.05 step from -1 up to 1).



Appendix A1.

Power functions fitting E/d relation and presented in the manuscript are not so reasonable from the statistic point of view. The Box-Cox transformation gives for K:

$$E_K^{-0.5} = -2 + 0.94d, R^2 = 0.998$$

and for Na:

$$E_{Na}^{-0.5} = -2.23 + 1.14d, R^2 = 0.998.$$

In other words,

$$E_K = \frac{1.13}{(d - 2.13)^2}; E_{Na} = \frac{0.77}{(d - 1.96)^2}. (*)$$

Corresponding calculation however gives energy values being nearly the same with the power fits. Furthermore, the equations (\*) do not satisfy physical meaning at boundary conditions while the power fits do: at  $d = 0$   $E \rightarrow +\infty$ , while at  $d \rightarrow +\infty$   $E \rightarrow 0$ .

Although the power functions given in the manuscript ( $E_{\text{int}} = 18670d^{9.656}$  and  $E_{\text{int}} = 35321d^{9.149}$ ) fit the E/d relation quite well, they should be used with caution since the standard error for  $a$  and  $x$  ( $E \sim a \cdot d^x$ ) are more than 2000 and 0.13 respectively (for corresponding  $R^2$  values 0.9911 and 0.9954).
